1 Rare Genomic Copy Number Variants Implicate New Candidate Genes for Bicuspid Aortic  
2 Valve

3

4 **Authors:** Steven G. Carlisle<sup>1</sup>, Hasan Albasha<sup>2</sup>, Hector Michelena<sup>3</sup>, Anna Sabate-Rotes<sup>4</sup>, Lisa  
5 Bianco<sup>4</sup>, Julie De Backer<sup>5</sup>, Laura Muiño Mosquera<sup>6</sup>, Anji T. Yetman<sup>7</sup>, Malenka M Bissell<sup>8</sup>,  
6 Maria Grazia Andreassi<sup>9</sup>, Ilenia Foffa<sup>9</sup>, Dawn S. Hui<sup>10</sup>, Anthony Caffarelli<sup>11</sup>, Yuli Y. Kim<sup>12</sup>,  
7 Dong-Chuan Guo<sup>1</sup>, Rodolfo Citro<sup>13</sup>, Margot De Marco<sup>14</sup>, Justin T. Tretter<sup>15</sup>, Kim L. McBride<sup>16</sup>,  
8 <sup>&</sup>EBAV Investigators, <sup>&</sup>BAVCon Investigators, Dianna M. Milewicz<sup>1</sup>, Simon C. Body<sup>17</sup>,  
9 Siddharth K. Prakash<sup>1</sup>

10

11 <sup>1</sup>Department of Internal Medicine, University of Texas Health Science Center at Houston, Houston,  
12 Texas.

13 <sup>2</sup>UCD School of Medicine, University College Dublin, Belfield, Dublin 4, Ireland.

14 <sup>3</sup>Department of Cardiovascular Medicine, Mayo Clinic, Rochester, Minnesota.

15 <sup>4</sup>Department of Pediatric Cardiology, Hospital Vall d'Hebron, Facultad de Medicina, Universidad  
16 Autònoma Barcelona, Barcelona, Spain.

17 <sup>5</sup>Centre for Medical Genetics, Ghent University Hospital, Ghent, Belgium; VASCERN HTAD European  
18 Reference Centre, Belgium; Department of Pediatrics, Division of Pediatric Cardiology, Ghent University  
19 Hospital, Ghent, Belgium; Department of Cardiology, Ghent University Hospital, Ghent, Belgium.

20 <sup>6</sup>Centre for Medical Genetics, Ghent University Hospital, Ghent, Belgium

21 <sup>7</sup>Children's Hospital and Medical Center, University of Nebraska, Omaha, Nebraska.

22 <sup>8</sup>Department of Biomedical Imaging Science, Leeds Institute of Cardiovascular and Metabolic Medicine,  
23 University of Leeds, Leeds, United Kingdom.

24 <sup>9</sup>Consiglio Nazionale delle Ricerche (CNR), Istituto di Fisiologia Clinica, Pisa, Italy.

25 <sup>10</sup>Department of Cardiothoracic Surgery, University of Texas Health Science Center San Antonio, Texas.

26 <sup>11</sup>Department of Cardiothoracic Surgery, Stanford University School of Medicine, Stanford, California.

27 <sup>12</sup>Division of Cardiovascular Medicine, The Hospital of the University of Pennsylvania, Perelman School  
28 of Medicine at the University of Pennsylvania, Philadelphia, Pennsylvania; Philadelphia Adult Congenital  
29 Heart Center, The Children's Hospital of Philadelphia, Perelman Center for Advanced Medicine, Penn  
30 Medicine, Philadelphia, Pennsylvania.

31 <sup>13</sup>Cardio-Thoracic and Vascular Department, University Hospital "San Giovanni di Dio e Ruggi  
32 d'Aragona," Salerno, Italy.

33 <sup>14</sup>Department of Medicine, Surgery and Dentistry Schola Medica Salernitana, University of Salerno,  
34 Baronissi, Italy.

35 <sup>15</sup>Heart Institute, Cincinnati Children's Hospital Medical Center, Cincinnati, Ohio.

36 <sup>16</sup>Division of Human Genetics, Ohio State University Wexner Medical Center, Columbus, Ohio.

37 <sup>17</sup>Department of Anesthesiology, Perioperative and Pain Medicine, Brigham and Women's  
38 Hospital/Harvard Medical School, Boston, Massachusetts.

39

40

41

42

43

44

45 Corresponding author:

46 Siddharth Prakash, MD, PhD, Department of Internal Medicine, John P. and Katherine G. McGovern  
47 Medical School, University of Texas Health Science Center at Houston, 6431 Fannin Street, MSB 6.116,  
48 Houston, Texas, USA

49 E-mail: [Siddharth.K.Prakash@uth.tmc.edu](mailto:Siddharth.K.Prakash@uth.tmc.edu); Office: 713-500-7003

50

51 <sup>&</sup>Complete lists of EBAV and BAVCon Investigators are provided in the Acknowledgments.

## 52 **Abstract**

53           Bicuspid aortic valve (BAV), the most common congenital heart defect, is a major cause  
54 of aortic valve disease requiring valve interventions and thoracic aortic aneurysms predisposing  
55 to acute aortic dissections. The spectrum of BAV ranges from early onset valve and aortic  
56 complications (EBAV) to sporadic late onset disease. Rare genomic copy number variants  
57 (CNVs) have previously been implicated in the development of BAV and thoracic aortic  
58 aneurysms. We determined the frequency and gene content of rare CNVs in EBAV probands (n  
59 = 272) using genome-wide SNP microarray analysis and three complementary CNV detection  
60 algorithms (cnvPartition, PennCNV, and QuantiSNP). Unselected control genotypes from the  
61 Database of Genotypes and Phenotypes were analyzed using identical methods. We filtered the  
62 data to select large genic CNVs that were detected by multiple algorithms. Findings were  
63 replicated in cohorts with late onset sporadic disease (n = 5040). We identified 34 large and rare  
64 (< 1:1000 in controls) CNVs in EBAV probands. The burden of CNVs intersecting with genes  
65 known to cause BAV when mutated was increased in case-control analysis. CNVs intersecting  
66 with *GATA4* and *DSCAM* were enriched in cases, recurrent in other datasets, and segregated with  
67 disease in families. In total, we identified potentially pathogenic CNVs in 8% of EBAV cases,  
68 implicating alterations of candidate genes at these loci in the pathogenesis of BAV.

## 69 **Author Summary**

70           Bicuspid aortic valve (BAV) is the most common form of congenital heart disease and  
71 can lead to long-term complications such as aortic stenosis, aortic regurgitation, or thoracic  
72 aortic aneurysms. Most BAV-related complications arise in late adulthood, but 10-15% of  
73 individuals with BAV develop early onset complications before age 30. Copy number variants  
74 (CNVs) are genomic structural variations that have been previously implicated in some types of  
75 congenital heart disease, including BAV. Here we demonstrate that individuals with early onset  
76 complications of BAV are enriched for specific rare CNVs compared to individuals with late-  
77 onset BAV disease. We also describe novel CNVs involving *DSCAM*, a gene on chromosome 21  
78 that has not previously been associated with the development of BAV. These results may lead to  
79 improved risk stratification and targeted therapies for BAV patients.

## 80 **Introduction**

81 Copy number variants (CNVs) have been implicated as causes or modifiers of many  
82 human diseases [1]. Specifically, large genomic CNVs are significantly enriched in cohorts with  
83 developmental delay or congenital abnormalities, and the severity of phenotypes has been  
84 correlated with the burden of rare CNVs [2]. These observations show that large, rare, *de novo*  
85 CNVs are likely to be pathogenic and can exert clinically relevant effects on disease  
86 pathogenesis [3-4].

87 Congenital heart disease (CHD) has a worldwide prevalence of 8.2 per 1000 live births  
88 [5]. CNVs have been implicated in both syndromic and non-syndromic forms of CHD [6-10].  
89 The pathogenicity and penetrance of CNVs was initially established for clinical syndromes such  
90 as velocardiofacial syndrome, Turner syndrome, or Williams–Beuren syndrome, which involve  
91 chromosomal or megabase scale duplications or deletions, but has since been expanded to  
92 include additional CHD subtypes [10]. CNVs contribute to 10% of all CHD cases and up to 25%  
93 of cases with extracardiac anomalies or other syndromic features [11]. The role of pathogenic  
94 CNVs affecting genes that are known to cause CHD when mutated, such as *GATA4* and *TBX1*,  
95 has been established [12]. Furthermore, population-level analysis has consistently demonstrated  
96 an increased burden of CHD in carriers of CNVs at specific genomic hotspots compared to  
97 controls, displaying the pathogenic potential of rare or *de novo* CNVs [12-14].

98 Bicuspid Aortic Valve (BAV) is the most common congenital heart malformation with a  
99 population prevalence of 0.5 – 2% [15]. BAV predisposes to aortic valve stenosis and thoracic  
100 aortic aneurysms and is associated with other left ventricular outflow tract lesions such as mitral  
101 valve disease and coarctation [16]. The high heritability of BAV was demonstrated in first- and

102 second-degree relatives, who are more than ten times more likely to be diagnosed with BAV  
103 compared to matched controls [17]. BAV can occur as an isolated congenital lesion or as part of  
104 a clinical syndrome. For example, the prevalence of BAV is increased in Velocardiofacial,  
105 Loey-Dietz, Kabuki, and Turner syndromes. Pathogenic variants of several genes are  
106 implicated in familial non-syndromic BAV, which is typically inherited as an autosomal  
107 dominant trait with reduced penetrance and variable expressivity. There is strong cumulative  
108 evidence that *GATA4*, *GATA6*, *NOTCH1*, *ROBO4*, *SMAD4*, *MUC4*, and *SMAD6* each contribute  
109 to a small percentage of non-syndromic BAV cases. Phenotypic expression of BAV disease  
110 ranges from incidental discovery in late adulthood to neonatal or childhood onset of  
111 complications. In comparison to patients with later disease onset, younger BAV cohorts tend to  
112 present with syndromic features or complex congenital malformations that are more likely to  
113 have a genetic cause, thereby increasing the power of association studies to discover clinically  
114 relevant CNVs [18]. Recently, we identified recurrent rare CNVs that were enriched for cardiac  
115 developmental genes in a young cohort with early-onset thoracic aortic aneurysms or acute aortic  
116 dissections [19].

117 We hypothesize that large rare genomic CNVs contribute to early onset complications of  
118 BAV. Consistent with previous observations, we predict that the burden and penetrance of rare  
119 CNVs will be increased in individuals with early onset disease when compared to elderly  
120 sporadic BAV cases and population controls. Identification of novel pathogenic CNVs can  
121 provide new insights into the genetic complexity of BAV and may be useful for personalized risk  
122 stratification or clinical guidance based on the specific recurrent CNV [20]. Therefore, we set out  
123 to describe the burden and penetrance of rare CNVs in a young cohort with early onset  
124 complications of BAV disease (EBAV).

125

## 126 **Materials and Methods**

127 The study protocol was approved by the Committee for the Protection of Human Subjects  
128 at the University of Texas Health Science Center at Houston (HSC-MS-11-0185). After written  
129 informed consent, we enrolled 272 probands of European ancestry with early onset BAV disease  
130 (EBAV), which we defined as individuals with BAV who were under the age of 30 at the time of  
131 first clinical event. Clinical events were defined as aortic replacement, aortic valve surgery,  
132 aortic dissection, moderate or severe aortic stenosis or aortic regurgitation, large aneurysm ( $Z >$   
133 4.5), or intervention for BAV-related conditions. Those with hypoplastic left heart, known  
134 genetic mutations, genetic syndromes, or complex congenital heart disease were excluded.  
135 Affected and unaffected family members of probands were included in this cohort for a total of  
136 544 individuals in 293 families (26 trios and 16 multiplex families). Samples were collected and  
137 genotyped similar to our previous study [21]. For comparison, we analyzed a cohort of older  
138 individuals of European ancestry with sporadic BAV disease selected from the International  
139 BAV Consortium (Table 1) [22].

140

141

142

**Table 1. Summary of Case Cohorts.**

| <b>Cohort</b>  | <b>Source</b>                | <b>Sample Size</b> | <b>Array</b>            |
|----------------|------------------------------|--------------------|-------------------------|
| <b>EBAV</b>    | UTHealth Houston             | 544                | Illumina GSA-24v1.0/2.0 |
| <b>BAVGWAS</b> | International BAV Consortium | 5040               | Illumina GSA-24v3.0     |

143 Cohort: name of case cohort; EBAV: family-based cohort selected for early onset complications of bicuspid aortic  
144 valve (BAV); BAVGWAS: unrelated probands with sporadic BAV disease. Source: origin of genotypes; Array:  
145 microarray used for genotyping.

146

147 Phenotypes were derived from record review with confirmation of image data whenever

148 possible [23-24]. The computational pipeline for CNV analysis of Illumina single nucleotide

149 polymorphism (SNP) array data included three independent CNV detection algorithms (Fig 1).

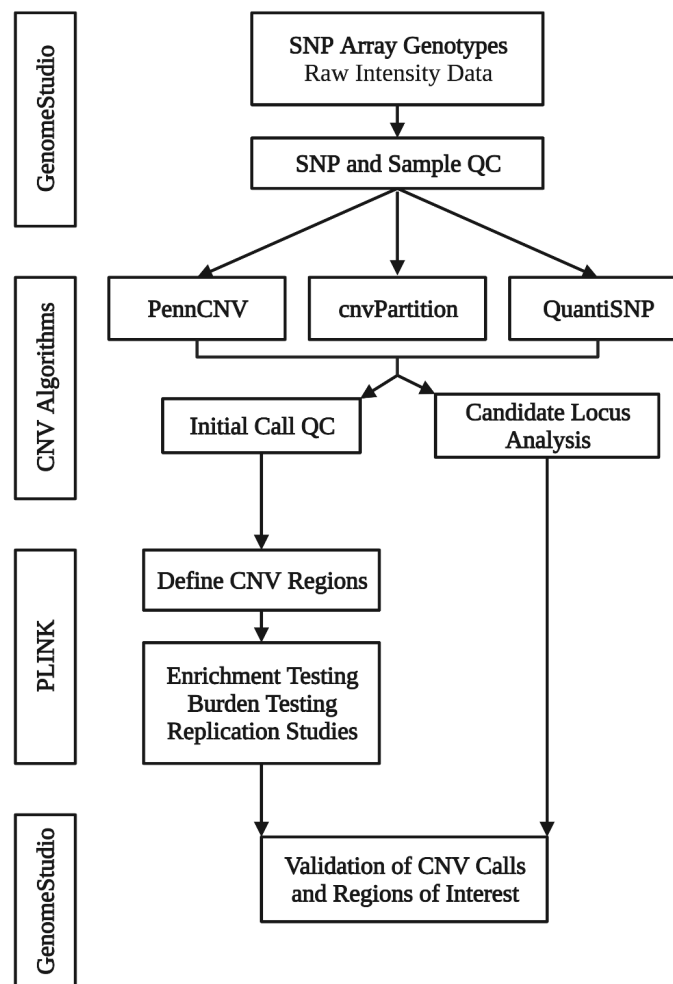

150

151 **Fig 1. Overview of Pipeline for CNV Identification and Validation.**

152 SNP, single nucleotide polymorphism. QC, Quality control. CNV, copy number variant. The software and  
153 algorithms used for the analysis are provided in boxes to the left of the corresponding steps. Illumina raw signal  
154 intensity data was trimmed and exported using GenomeStudio. The intensity data was then analyzed with three  
155 different CNV calling algorithms (PennCNV [25], cnvPartition, and QuantiSNP [26]) to generate initial CNV calls  
156 and sample-level statistics. Sample-level quality control analysis was performed using PennCNV. PLINK [27]  
157 toolset was used to define CNV regions from initial CNV calls for subsequent burden testing, enrichment studies,  
158 and replication studies. The initial CNV calls were individually screened for CNVs intersecting with candidate loci,  
159 which we defined as genes implicated in bicuspid aortic valve disease and those discovered in our enrichment  
160 studies. CNVs of interest were then validated in GenomeStudio.

161

162 GenomeStudio was used to exclude samples with indeterminate sex or more than 5%

163 missing genotypes, and single nucleotide polymorphisms (SNPs) with GenTrain = 0. Principal

164 component analysis was used to remove outliers that did not cluster with European ancestry.

165 Only SNPs common to all microarray platforms were included.



166 Three independent algorithms (PennCNV, cnvPartition, and QuantiSNP) were used to  
167 generate CNV calls and sample-level quality statistics from SNP intensity data. PennCNV and  
168 QuantiSNP were run on Unix clusters and cnvPartition data were exported from GenomeStudio.  
169 The analysis was run using default configurations.

170 PennCNV was used to generate QC data and remove CNV calls that intersect with  
171 polymorphic genomic regions. Samples that met any of the following criteria were excluded:  
172 standard deviation of the LogR ratio (obtained from PennCNV)  $> 0.35$  or number of CNVs  $> 2$   
173 standard deviations above the mean for each data set. CNV calls less than 20 kilobase pairs  
174 and/or spanned by less than 6 SNP probes were excluded. The overlap function for rare CNVs in  
175 PLINK was used to construct CNV regions (CNVRs) and adjacent regions were merged using  
176 PennCNV.

177 LogR ratio (LRR) and B allele frequency (BAF) data at CNVRs and calls of interest were  
178 visualized in GenomeStudio for validation. For segregation analysis, GenomeStudio was used to  
179 determine the presence of CNVs in relatives.

180 A total of 22,014 unselected control Illumina Genotypes obtained from the Database of  
181 Genotypes and Phenotypes were analyzed using identical methods (Table in S1Table). Cohorts  
182 were paired as follows for case-control analysis based on the concordance of sample-level  
183 quality control statistics (mean number of CNV calls and mean standard deviation of the LogR  
184 Ratio): EBAV and WLS, BAVGWAS and HRS.

185 PLINK was used to catalog CNV calls and perform burden and enrichment studies. Case  
186 - control burden tests were restricted to large (250 - 5000 kilobase pairs), rare (occurring in less  
187 than 1 in 1000 samples; total of cases and controls), and validated CNV calls in EBAV probands.  
188 Genome Reference Consortium Human Build 37 [28] was used for CNV annotation.

## 189 Results

190 Compared to BAVGWAS probands, EBAV probands were significantly younger at  
 191 diagnosis, had more frequent co-existing congenital heart and vascular lesions, and underwent  
 192 more frequent valve or aortic operations. A phenotype summary of the EBAV and BAVGWAS  
 193 Cohorts is provided in Table 2.

195 **Table 2. Characteristics of EBAV and BAVGWAS Probands.**

|                          | EBAV (n = 279) | BAVGWAS (n = 3141) |
|--------------------------|----------------|--------------------|
| Female (%)               | 33             | 29                 |
| Age at diagnosis (years) | 17 □ 13        | 52 □ 16            |
| TAA (%)                  | 20             | 37                 |
| Predominant AR (%)       | 12             | 40                 |
| Predominant AS (%)       | 20             | 37                 |
| Other Lesions (%)        | 53             | 1                  |
| Aortic Replacement (%)   | 27             | 16                 |
| Aortic Valve Surgery (%) | 40             | 16                 |

197 N: number of cases; □, standard deviation; TAA, thoracic aortic aneurysm; AR: aortic regurgitation; AS, aortic  
 198 stenosis; Other Lesions, other congenital heart malformations (primarily coarctation or ventricular septal defect). We  
 199 had phenotype information for 279 EBAV probands but did not have access to genotype information for all samples.

200  
 201 CNV analysis is summarized in Table 3. The percentages of individuals with large and  
 202 rare CNV regions were relatively consistent throughout datasets. The prevalence of large and  
 203 rare CNVs, specifically large genomic deletions, was increased in EBAV cases compared to  
 204 controls (Table S2).

205 **Table 3. Summary of CNV Calls for EBAV Cohort.**

|              | RATE                 | $p^E$              | $p^B$ | PROP                 | $p^E$                | $p^B$ | TOT  | $p^E$                | $p^B$                | AVG | $p^E$                | $p^B$                |
|--------------|----------------------|--------------------|-------|----------------------|----------------------|-------|------|----------------------|----------------------|-----|----------------------|----------------------|
| Large        | 0.51                 | $1 \times 10^{-7}$ | 1     | 0.17                 | 1                    | 1     | 2648 | $1 \times 10^{-7}$   | $2.2 \times 10^{-2}$ | 690 | $1 \times 10^{-7}$   | $6 \times 10^{-5}$   |
| Rare         | 0.36                 | 0.79               | 1     | 0.21                 | 1                    | 1     | 426  | $6.1 \times 10^{-4}$ | 0.87                 | 288 | $4.1 \times 10^{-2}$ | 0.6                  |
| Duplications | $7.1 \times 10^{-2}$ | 0.96               | 1     | $6.8 \times 10^{-2}$ | 0.96                 | 1     | 648  | 0.25                 | 0.98                 | 615 | 0.18                 | 0.98                 |
| Deletions    | 0.11                 | $1 \times 10^{-7}$ | 1     | $4.8 \times 10^{-2}$ | $1.9 \times 10^{-2}$ | 1     | 1477 | $1.1 \times 10^{-3}$ | $4.1 \times 10^{-2}$ | 608 | 0.23                 | $1.7 \times 10^{-2}$ |

207 Large: CNV regions between 250 Kb and 5 Mb in length. Rare: occur in fewer than 1 in 1000 individuals; Rate:  
 208 number of CNVs per individual; Prop: proportion of samples with one or more CNVs; TOT: total length of all  
 209 CNVs in kilobases; AVG: mean CNV length.  $p^E$ ,  $p$ -value for EBAV cohort in respective category.  $p^B$ ,  $p$ -value for

210 BAVGWAS in respective category. Tests are 1-sided with 100,000 permutations. A subset of CNV calls from the  
 211 EBAV and BAVGWAS datasets were validated by examining GenomeStudio plots. In total, 125/347 (36%) of  
 212 EBAV and 289/600 (48%) of BAVGWAS CNVs were validated.  
 213  
 214 There were 34 large (>250 Kb), rare (<1:1000 in dbGAP controls) CNV regions that  
 215 involved protein-coding genes in EBAV cases (Table S3). Seven of these genic CNVs were  
 216 enriched in EBAV cases compared to WLS controls with a genome-wide adjusted empiric  $P <$   
 217 0.05. These CNVs included the genes *PCP4*, *DSCAM*, *MIR4760*, and *DSCAM-AS1* in 21q22 and  
 218 *GATA4*, *C8orf49*, *NEIL2*, *FDFT1*, and *CTSB* in 8p23. Large duplications involving the  
 219 Velocardiofacial (VCFS) region in 22q11.2 and 1q21.1 microduplications were also enriched in  
 220 EBAV cases (Table S4). The overall burden of large, rare, genic CNVs was not different  
 221 between EBAV cases and WLS controls. However, the burden of large, rare genic CNVs  
 222 intersecting with genes known to cause BAV when mutated or implicated in syndromic BAV  
 223 was significantly increased in EBAV cases (Table 4).

224 **Table 4. Burden Testing of Rare EBAV CNVs.**  
 225

|                  | <u>EBAV</u> |                      | <u>WLS</u> |                      | RR   | P                    |
|------------------|-------------|----------------------|------------|----------------------|------|----------------------|
|                  | Calls       | Rate                 | Calls      | Rate                 |      |                      |
| <b>Genic</b>     | 28          | 0.8                  | 1151       | 0.65                 | 1.2  | 0.23                 |
| <b>Deletions</b> | 11          | $3.8 \times 10^{-2}$ | 439        | $4.6 \times 10^{-2}$ | 0.81 | 0.78                 |
| <b>BAV</b>       | 3           | $1.0 \times 10^{-2}$ | 1          | $1.1 \times 10^{-4}$ | 97   | $1.1 \times 10^{-3}$ |
| <b>Total</b>     | 34          | -                    | 1443       | -                    | -    | -                    |

226 Calls: total number of CNVs that met the specified criteria. Rate: number of CNVs per individual; RR: relative risk;  
 227 P: p-value; Genic: CNVs that intersect with genes; BAV: CNVs that intersect with genes that are known to cause  
 228 bicuspid aortic valve (BAV) when mutated or implicated in syndromic BAV. Total: total number of large, rare  
 229 CNVs or CNVRs. Tests are 2-sided using 100,000 permutations.  
 230

231 We also scrutinized genomic regions that are implicated in CHD by careful analysis of  
 232 data from individual CNV algorithms to detect subtle copy number alterations. We identified  
 233 additional rare EBAV CNVs that intersect with CHD candidate genes *CELSR1*, *GJA5*, *RAF1*,  
 234 *LTBP1*, *KIF1A*, *MYH11*, *MAPK3*, *TTN*, and the VCFS region in 22q11.2. We detected additional  
 235 *GATA4* and *DSCAM* CNVs in multiplex families. These CNVs were enriched in EBAV cases  
 236 compared to WLS controls (Table 5).

237

**Table 5. CNVs Affecting Congenital Heart Disease Genes in EBAV Cohort.**

| Region                   | Genes             | Case | Control | OR  | 95% CI     |
|--------------------------|-------------------|------|---------|-----|------------|
| Chr22:46261909-51187440  | <i>CELSR1</i>     | 1    | 1       | 33  | 2.1 to 530 |
| Chr1:146326373-147340734 | <i>GJA5</i>       | 1    | 2       | 17  | 1.5 to 183 |
| Chr3:12599717-12803792   | <i>RAF1</i>       | 1    | 2       | 17  | 1.5 to 183 |
| Chr22:41278694-41813285  | <i>DSCAM</i>      | 4    | 2       | 67  | 12 to 367  |
| Chr8:11495032-11856903   | <i>GATA4</i>      | 4    | 0       | 301 | 16 to 5599 |
| Chr22:19000000-22000000  | <i>TBX1, CRKL</i> | 4    | 10      | 13  | 4.2 to 43  |
| Chr16:15484868-16295863  | <i>MYH11</i>      | 2    | 22      | 3.0 | 0.70 to 13 |
| Chr2:241652252-241678528 | <i>KIF1A</i>      | 3    | 22      | 4.5 | 1.3 to 15  |
| Chr2:32775984-33331219   | <i>LTBP1</i>      | 2    | 26      | 2.5 | 0.60 to 11 |

238

Region: coordinates corresponding to the minimum overlap region of CNVs; Genes: cardio-developmental candidate genes in the region. Case: number of large and rare CNVs in EBAV cases that intersect with region of interest. Control: number of CNVs in WLS cohort that intersect with region of interest. OR: odds ratio; 95% CI, 95% confidence interval for respective odds ratio.

239

240

241

242

243

Next, we attempted to replicate our observations by identifying CNVs in the BAVGWAS

244

dataset that overlapped with rare EBAV CNVs. We found that large duplications involving

245

*SOX7* and *GATA4* in 8p23 and the VCFS region in 22q11.2 were also significantly enriched in

246

BAVGWAS cases compared to HRS controls (Table 6, Table S6 and S7).

247

248

**Table 6. CNVs Affecting Congenital Heart Disease Genes in BAVGWAS Cohort.**

| Region                   | Genes                 | Case | Control | OR   | 95% CI      |
|--------------------------|-----------------------|------|---------|------|-------------|
| Chr3:29993977-31273870   | <i>TGFBR2</i>         | 1    | 0       | 5.6  | 0.23 to 138 |
| Chr9:101861767-102092282 | <i>TGFBR1</i>         | 1    | 0       | 5.6  | 0.23 to 138 |
| Chr21:41577819-41842252  | <i>DSCAM</i>          | 2    | 1       | 3.7  | 0.34 to 41  |
| Chr22:46924254-46931077  | <i>CELSR1</i>         | 3    | 1       | 5.6  | 0.58 to 54  |
| Chr2:111404636-11310378  | <i>TMEM87B, FBLN7</i> | 3    | 2       | 2.8  | 0.47 to 17  |
| Chr8:11385469-11821835   | <i>GATA4</i>          | 8    | 1       | 15   | 1.9 to 120  |
| Chr12:7918339-8130958    | <i>NANOG</i>          | 10   | 2       | 9.4  | 2.1 to 43   |
| Chr2:147166377-147308112 | <i>GJA5</i>           | 4    | 10      | 0.75 | 0.23 to 2.4 |
| Chr16:29664753-30199713  | <i>MAPK3</i>          | 3    | 15      | 0.37 | 0.11 to 1.3 |
| Chr22:19000000-22000000  | <i>TBX1, CRKL</i>     | 18   | 11      | 3.1  | 1.4 to 6.5  |
| Chr2:32689829-33299434   | <i>LTBP1</i>          | 9    | 22      | 0.76 | 0.35 to 1.7 |
| Chr16:15240816-16281154  | <i>MYH11</i>          | 13   | 27      | 0.90 | 0.46 to 1.7 |
| Chr2:241640262-241689833 | <i>KIF1A</i>          | 13   | 30      | 0.81 | 0.42 to 1.6 |

249

Region: coordinates corresponding to the minimum overlap region of CNVs; Genes: cardio-developmental candidate genes in the region. Case: number of large and rare CNVs in BAVGWAS cases that intersect with region of interest. Control: number of CNVs in HRS cohort that intersect with region of interest. OR: odds ratio; 95% CI, 95% confidence interval for respective odds ratio.

250

251

252

253

254 CNVs intersecting with *GATA4* and *DSCAM* significantly overlapped between EBAV  
 255 and BAVGWAS datasets (Fig 2). On average, the *GATA4* CNVs were larger in the BAVGWAS  
 256 dataset while the *DSCAM* CNVs were larger in the EBAV dataset.

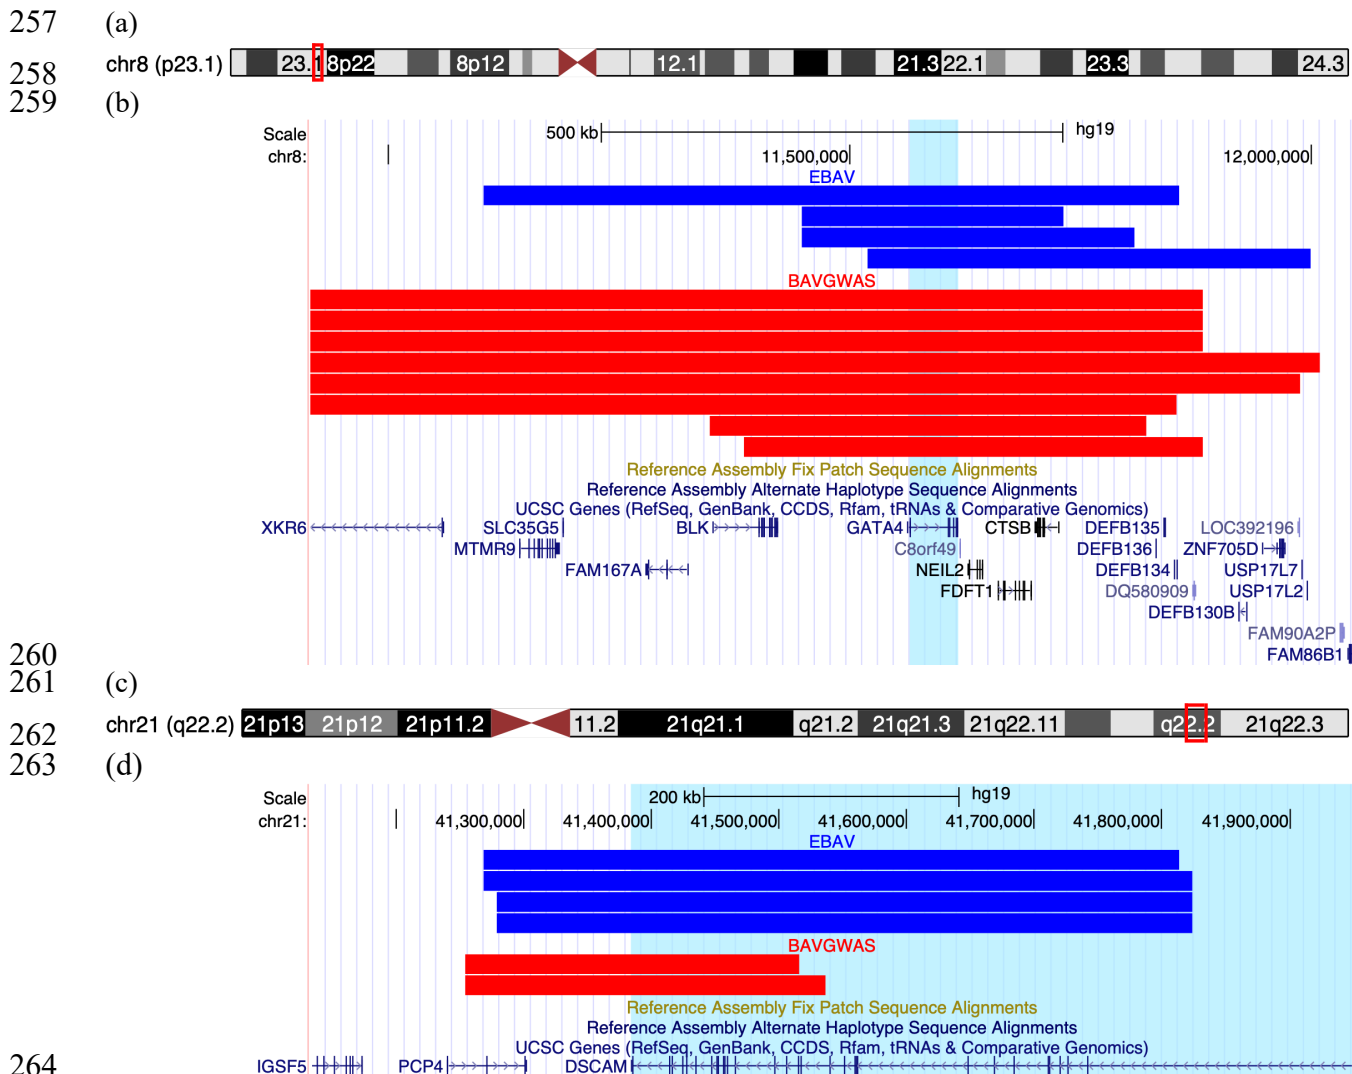

264 **Fig 2. UCSC Genome Browser Plots of *GATA4* and *DSCAM* Variants.**

265 (a) Ideogram of Chromosome 8 with view of image in (b) outlined in red box. (b) Plot of *GATA4* variants. Each bar represents a copy number variant (CNV). CNVs from the EBAV cohort are in blue and CNVs from the BAVGWAS cohort are in red. The region spanned by *GATA4* has been highlighted in light blue. (c) Ideogram of Chromosome 21 with view of image in (d) outlined in red box. (d) Plot of *DSCAM* variants. EBAV CNVs are in blue and BAVGWAS CNVs are in red. The region spanned by *DSCAM* is highlighted in light blue. Figures constructed using the UCSC Genome Browser, <http://genome.ucsc.edu> [29].

274 We identified 7 additional CNV regions that are enriched in BAVGWAS cases but not in  
 275 EBAV and are rare or absent in controls (Table S5). *NANOG* and *NIBPL* are essential for early

276 heart development, and mutation of *NIBPL* causes Cornelia-de Lange syndrome with a spectrum  
277 of congenital heart malformations including BAV.

278 We also identified 21 very large genomic CNVs more than 5 Mb in length in the  
279 BAVGWAS dataset. Analysis of GenomeStudio data showed that most of these were mosaic  
280 loss of heterozygosity regions or duplications. Nine were large germline chromosome-scale  
281 aberrations, including two cases of trisomy 21 (Table S8). We did not identify any large X  
282 chromosome copy variants that may be consistent with Turner syndrome. There were no  
283 megabase-scale copy number variants in the EBAV dataset.

284 Pedigree analysis showed that several CNVs involving *CELSR1*, *LTBP1*, *KIF1A*, *GATA4*,  
285 and *DSCAM* segregate with BAV in EBAV families (Table S9). CNV carriers tended to present  
286 due to moderate or severe aortic regurgitation requiring valvular surgery. One proband had aortic  
287 coarctation. The youngest age at presentation was 13 years. There were no sex differences in  
288 presentation between CNV carriers.

289

## 290 **Discussion**

291 We identified large, rare, and likely pathogenic CNVs in almost 10% of EBAV probands  
292 that are enriched in genes that cause BAV when mutated. The percentage of EBAV cases with  
293 likely pathogenic CNVs is similar to our previous observations in a cohort with early onset TAD  
294 [30]. Enrichment of CNVs involving *GATA4* and *DSCAM* in EBAV cases replicated in two  
295 additional BAV datasets and thousands of unselected control genotypes. This analysis provides  
296 compelling evidence that rare CNVs collectively cause more BAV cases than any single mutated  
297 gene.

298 GATA-Binding Protein 4 is a transcription factor that is required for cardiac and neuronal  
299 differentiation during embryogenesis [31]. Mutations of *GATA4* and its homologs *GATA5* and  
300 *GATA6* cause congenital heart lesions [32]. Mutations in the *GATA4* gene have been linked to a  
301 range of congenital heart diseases in humans, such as cardiac septal defects, tetralogy of Fallot,  
302 and patent ductus arteriosus [33]. Patients with BAV who have rare functional variants in the  
303 *GATA* family exhibit varying degrees of aortopathy expression, including aortic aneurysm,  
304 dissection, and/or aortic stenosis. Alonso-Montes et al. described 4 predicted deleterious *GATA4*  
305 mutations in 122 non-syndromic BAV probands who did not have affected relatives [34]. Rare  
306 *GATA4* deletions and putative loss of function mutations are also implicated in CHD with  
307 distinctive features, underlining the importance of *GATA4* dosage to cardiac development [35-  
308 36]. Glessner et al. discovered large *de novo* (~4Mb) duplications involving *GATA4* in CHD trios  
309 with conotruncal defects or left ventricular outflow tract obstructive lesions [37]. Some  
310 duplications were inherited from apparently unaffected parents. Zogopoulos and Yu described  
311 similar genomic duplications in unaffected individuals and in unselected control genotypes [38-  
312 39].

313 These observations are consistent with low-penetrance CHD in *GATA4* duplication  
314 carriers. Similar to other complex and multifactorial disorders, CHD pathogenesis is likely  
315 caused by the cumulative impact of multiple CNVs or mutations, each exerting small to  
316 moderate effects to collectively disrupt cardiac development. For example, the frequency of  
317 congenital heart lesions is increased in individuals with velocardiofacial syndrome who have  
318 22q1.2 deletions and a common 12p13.31 duplication involving the *SLC2A3* gene. The *SLC2A3*  
319 CNV likely functions as a modifier of the cardiac phenotype associated with 22q11 deletion  
320 syndrome, exemplifying a “two-hit” model [40].



321 More than half of patients with Down syndrome have congenital heart malformations due  
322 to the interaction of multiple dosage-sensitive CHD genes on chromosome 21 [41-43]. Down  
323 syndrome cell adhesion molecule, previously shown to play a critical role in neurogenesis, has  
324 also been implicated in the pathophysiology of CHD [44]. Analysis of rare segmental trisomies  
325 of chromosome 21 suggested that duplication of *DSCAM* and the contiguous *COL6A1* and  
326 *COL6A2* genes may cause septal abnormalities and other Down Syndrome-related CHD lesions,  
327 including BAV. Overexpression of *DSCAM* and *COL6A2* causes cardiac malformations in mice  
328 [45]. Our findings suggest that rare CNVs involving *DSCAM* may contribute to some non-  
329 syndromic BAV cases.

330 Consistent with previous observations, *GATA4* and *DSCAM* CNVs segregated with  
331 disease in multiple families, but are not fully penetrant and were detected in some unaffected  
332 relatives. Intriguingly, large 22q11.2, *GATA4* and *DSCAM* CNVs were more highly enriched in  
333 EBAV than in BAVGWAS cases, suggesting that these CNVs may drive early onset BAV  
334 disease. These results are consistent with our observation that pathogenic CNVs involving  
335 candidate BAV genes are also enriched in EBAV compared to BAVGWAS cases. Our data  
336 suggests that pathogenic CNVs at these loci may predict accelerated disease onset or more severe  
337 complications.

338 We also identified recurrent rare CNVs of specific dosage-sensitive regions that affect  
339 cardiac developmental genes and are implicated in non-syndromic CHD. Recurrent 1q21.1 distal  
340 deletions encompassing *GJA5*, the gene encoding Connexin-40, are associated with CHD lesions  
341 including BAV. A study of 807 TOF cases showed significant enrichment of small duplications  
342 spanning the *GJA5* gene, providing compelling evidence that it acted as the primary candidate  
343 gene, supporting the association of *GJA5* and CHD [31]. Additionally, cardiac abnormalities



344 have been documented in mice with a targeted *GJA5* deletion, implying that haploinsufficiency  
345 of *GJA5* might contribute to cardiac defects in individuals affected by 1q21.1 deletions [46].  
346 *CELSRI*, a cadherin superfamily member, is mutated in families with BAV and hypoplastic left  
347 heart syndrome [47]. *LTBP1* encodes an extracellular matrix protein that regulates TGF-beta and  
348 fibrillin and has been implicated in congenital heart lesions [48]. *KIF1A*, encoding a kinesin  
349 microtubule transporter, was implicated in a dominant multisystem syndromic disorder with  
350 valvular and cardiac defects [49]. Mutation of *MYH11* causes familial thoracic aortic aneurysms  
351 and dissections with an increased prevalence of BAV [50]. *TTN* mutations cause dilated  
352 cardiomyopathy and are associated with other left-sided congenital lesions [51]. Mutations or  
353 copy number changes involving these genes all cause a wide spectrum of penetrance and  
354 phenotypic severity, consistent with sensitivity to genetic or clinical modifiers.

355         Our combinatorial analysis method eliminated many CNVs that were detected by single  
356 algorithms or did not meet quality control benchmarks. Therefore, our analysis likely  
357 underestimated the contribution of rare pathogenic CNVs to BAV. We also recognize that  
358 cardiac development involves the complex interaction of many genes. We selectively validated  
359 individual CNVs at loci of interest but may have underrepresented CNVs that had no *a priori*  
360 relationship with CHD. The apparent penetrance of some CNVs may be less than expected due  
361 to missing phenotypic information. The available clinical data was not sufficiently detailed to  
362 permit genotype-phenotype correlations with specific CHD clinical features.

363         In conclusion, we identified large rare CNVs in a significant proportion of BAV cases,  
364 including a subset of CNVs that may predict early onset complications of BAV disease. These  
365 observations add to the evidence that rare CNVs may eventually have clinical utility for risk  
366 stratification and personalized disease management.

## 367 **Acknowledgments**

368 We thank Joana Castillo and Jacqueline Jennings for sample preparation, and Gladys Zapata,  
369 Nitesh Mehta, and the Laboratory for Translational Genomics at Baylor College of Medicine for  
370 microarray genotyping. This study was supported in part by R01HL137028 (SP). Fig 1 created  
371 with BioRender.com.

372 The EBAV Investigators are: Shaine A. Morris, Rita Milewski, Giuseppe Limongelli, Allesandro  
373 Della Corte, Laura Perrone, Yuli Y. Kim, Hector Michelena, Maria G. Andreassi, Arturo  
374 Evangelista, Denver Sallee, Anji Yetman, Kim McBride, Eduardo Bossone, Rodolfo Citro,  
375 Dawn S. Hui, Malenka M. Bissell, Andrea Ballotti, Ilenia Foffa, Margot De Marco, Anthony  
376 Caffarelli, Rita Weise, Julie DeBacker, Laura Muino Mosquera, Robbin Cohen, Laura Dos  
377 Subira, Justin T. Tretter, Anna Sabe Rotes, Martina Caiazza, Lamia Ait Ali, Francesca  
378 Pluchinotta, and Simon C. Body.

379 The BAVCon Investigators are: Simon Body, Alessandro Della Corte, Alessandro Frigiola,  
380 Andrea Ballotta, Arturo Evangelista, Betti Giusti, Bo Yang, Carlo de Vincentiis, Dan Gilon,  
381 David Messika Zeitoun, Dianna M. Milewicz, Eduardo Bossone, Eric Eisselbacher, Francesca R.  
382 Pluchinotta, Giuseppe Limongelli, Gordon S. Huggins, Hector I. Michelena, J. Daniel  
383 Muehlschelgel, Kim Eagle, Lasse Folkerson, Malenka M. Bissell, María Brion, Patrick Mathieu,  
384 Per Eriksson, Peter Lichtner, Rodolfo Citro, Ronen Durst, Sébastien Thériault, Siddharth K.  
385 Prakash, Thoralf M. Sundt, Vicenza Stefano Nistri, Yahn Bossé.

## 386 **References**

- 387 1. Zhang F, Gu W, Hurles ME, Lupski JR. Copy number variation in human health, disease, and  
388 evolution. *Annual review of genomics and human genetics*. 2009;10:451.
- 389 2. Cooper GM, Coe BP, Girirajan S, Rosenfeld JA, Vu TH, Baker C, Williams C, Stalker H,  
390 Hamid R, Hannig V, Abdel-Hamid H. A copy number variation morbidity map of developmental  
391 delay. *Nature genetics*. 2011 Sep;43(9):838-46.
- 392 3. Girirajan S, Rosenfeld JA, Coe BP, Parikh S, Friedman N, Goldstein A, Filipink RA,  
393 McConnell JS, Angle B, Meschino WS, Nezarati MM. Phenotypic heterogeneity of genomic  
394 disorders and rare copy-number variants. *New England Journal of Medicine*. 2012 Oct  
395 4;367(14):1321-31.
- 396 4. Kaufman L, Ayub M, Vincent JB. The genetic basis of non-syndromic intellectual disability: a  
397 review. *Journal of neurodevelopmental disorders*. 2010 Dec;2(4):182-209.
- 398 5. Liu, Y., Chen, S., Zühlke, L., Black, G., Choy, M. K., Li, N., & Keavney, B. (2019). Global  
399 birth prevalence of congenital heart defects 1970–2017: Updated systematic review and meta-  
400 analysis of 260 studies. *International Journal of Epidemiology*, 48(42), 455–463.
- 401 6. Hitz MP, Lemieux-Perreault LP, Marshall C, Feroz-Zada Y, Davies R, Yang SW, Lionel AC,  
402 D'Amours G, Lemyre E, Cullum R, Bigras JL. Rare copy number variants contribute to  
403 congenital left-sided heart disease.
- 404 7. Warburton D, Ronemus M, Kline J, Jobanputra V, Williams I, Anyane-Yeboah K, Chung W,  
405 Yu L, Wong N, Awad D, Yu CY. The contribution of de novo and rare inherited copy number  
406 changes to congenital heart disease in an unselected sample of children with conotruncal defects  
407 or hypoplastic left heart disease. *Human genetics*. 2014 Jan;133:11-27.
- 408 8. Silversides CK, Lionel AC, Costain G, Merico D, Migita O, Liu B, Yuen T, Rickaby J,  
409 Thiruvahindrapuram B, Marshall CR, Scherer SW. Rare copy number variations in adults with  
410 tetralogy of Fallot implicate novel risk gene pathways.
- 411 9. Ware SM, Jefferies JL. New genetic insights into congenital heart disease. *Journal of clinical*  
412 *& experimental cardiology*. 2012 Jun 6.
- 413 10. Sørensen KM, El-Segaier M, Fernlund E, Errami A, Bouvagnet P, Nehme N, Steensberg J,  
414 Hjortdal V, Soller M, Behjati M, Werge T. Screening of congenital heart disease patients using  
415 multiplex ligation-dependent probe amplification: Early diagnosis of syndromic patients.  
416 *American journal of medical genetics Part A*. 2012 Apr;158(4):720-5.
- 417 11. Lander J, Ware SM. Copy number variation in congenital heart defects. *Current Genetic*  
418 *Medicine Reports*. 2014 Sep;2:168-78.

- 419 12. Tomita-Mitchell A, Mahnke DK, Struble CA, Tuffnell ME, Stamm KD, Hidestrand M,  
420 Harris SE, Goetsch MA, Simpson PM, Bick DP, Broeckel U. Human gene copy number spectra  
421 analysis in congenital heart malformations. *Physiological genomics*. 2012 May 1;44(9):518-41.
- 422 13. Kim DS, Kim JH, Burt AA, Crosslin DR, Burnham N, Kim CE, McDonald-McGinn DM,  
423 Zackai EH, Nicolson SC, Spray TL, Stanaway IB. Burden of potentially pathologic copy number  
424 variants is higher in children with isolated congenital heart disease and significantly impairs  
425 covariate-adjusted transplant-free survival. *The Journal of thoracic and cardiovascular surgery*.  
426 2016 Apr 1;151(4):1147-51.
- 427 14. Soemedi R, Wilson IJ, Bentham J, Darlay R, Töpf A, Zelenika D, Cosgrove C, Setchfield K,  
428 Thornborough C, Granados-Riveron J, Blue GM. Contribution of global rare copy-number  
429 variants to the risk of sporadic congenital heart disease. *The American Journal of Human*  
430 *Genetics*. 2012 Sep 7;91(3):489-501.
- 431 15. Chandra S, Lang RM, Nicolarsen J, Gayat E, Spencer KT, Mor-Avi V, Hofmann Bowman  
432 MA. Bicuspid aortic valve: inter-racial difference in frequency and aortic dimensions. *JACC:*  
433 *Cardiovascular Imaging*. 2012 Oct;5(10):981-9.
- 434 16. Michelena HI, Prakash SK, Della Corte A, Bissell MM, Anavekar N, Mathieu P, Bossé Y,  
435 Limongelli G, Bossone E, Benson DW, Lancellotti P. Bicuspid aortic valve: identifying  
436 knowledge gaps and rising to the challenge from the International Bicuspid Aortic Valve  
437 Consortium (BAVCon). *Circulation*. 2014 Jun 24;129(25):2691-704.
- 438 17. Glotzbach JP, Hanson HA, Tonna JE, Horns JJ, McCarty Allen C, Presson AP, Griffin CL,  
439 Zak M, Sharma V, Tristani-Firouzi M, Selzman CH. Familial Associations of Prevalence and  
440 Cause-Specific Mortality for Thoracic Aortic Disease and Bicuspid Aortic Valve in a Large-  
441 Population Database. *Circulation*. 2023 Jun 15.
- 442 18. Prakash SK, Yetman A, Bissell MM, Kim YY, Michelena H, Hui DS, Caffarelli A,  
443 Andreassi MG, Foffa I, Jennings J, Citro R. Recurrent genomic copy number variants implicate  
444 new candidate genes for early onset bicuspid aortic valve disease. *Journal of the American*  
445 *College of Cardiology*. 2019 Mar 12;73(9S1):620-.
- 446 19. Prakash S, Kuang SQ, GenTAC Registry Investigators, Regalado E, Guo D, Milewicz D.  
447 Recurrent rare genomic copy number variants and bicuspid aortic valve are enriched in early  
448 onset thoracic aortic aneurysms and dissections. *PloS one*. 2016 Apr 19;11(4):e0153543.
- 449 20. Balistreri CR, Cavarretta E, Sciarretta S, Frati G. Light on the molecular and cellular  
450 mechanisms of bicuspid aortic valve to unveil phenotypic heterogeneity. *Journal of Molecular*  
451 *and Cellular Cardiology*. 2019;133: 113–114. Doi:10.1016/j.yjmcc.2019.06.004.
- 452 21. Prakash, S.K., LeMaire, S.A., Guo, D.C., Russell, L., Regalado, E.S., Golabbakhsh, H.,  
453 Johnson, R.J., Safi, H.J., Estrera, A.L., Coselli, J.S. and Bray, M.S., 2010. Rare copy number -  
454 variants disrupt genes regulating vascular smooth muscle cell adhesion and contractility in  
455 sporadic thoracic aortic aneurysms and dissections. *The American Journal of Human*  
456 *Genetics*, 87(6), pp.743-756.

- 457 22. Prakash SK, Bossé Y, Muehlschlegel JD, Michelena HI, Limongelli G, Della Corte A,  
458 Pluchinotta FR, Russo MG, Evangelista A, Benson DW, Body SC. A roadmap to investigate the  
459 genetic basis of bicuspid aortic valve and its complications: insights from the International  
460 BAVCon (Bicuspid Aortic Valve Consortium). *Journal of the American College of Cardiology*.  
461 2014 Aug 26;64(8):832-9.
- 462
- 463 23. PA Harris, R Taylor, R Thielke, J Payne, N Gonzalez, JG. Conde. Research electronic data  
464 capture (REDCap) – A metadata-driven methodology and workflow process for providing  
465 translational research informatics support. *J Biomed Inform*. 2009 Apr;42(2):377-81.
- 466 24. PA Harris, R Taylor, BL Minor, V Elliott, M Fernandez, L O’Neal, L McLeod, G Delacqua,  
467 F Delacqua, J Kirby, SN Duda, REDCap Consortium, The REDCap consortium. Building an  
468 international community of software partners. *J Biomed Inform*. 2019 May 9 [doi:  
469 10.1016/j.jbi.2019.103208].
- 470 25. Wang K, Li M, Hadley D, Liu R, Glessner J, Grant SF, Hakonarson H, Bucan M. PennCNV:  
471 an integrated hidden Markov model designed for high-resolution copy number variation  
472 detection in whole-genome SNP genotyping data. *Genome research*. 2007 Nov 1;17(11):1665-  
473 74.
- 474 26. Colella S, Yau C, Taylor JM, Mirza G, Butler H, Clouston P, Bassett AS, Seller A, Holmes  
475 CC, Ragoussis J. QuantiSNP: an Objective Bayes Hidden-Markov Model to detect and  
476 accurately map copy number variation using SNP genotyping data. *Nucleic acids research*. 2007  
477 Mar 1;35(6):2013-25.
- 478 27. Purcell S, Neale B, Todd-Brown K, Thomas L, Ferreira MA, Bender D, Maller J, Sklar P, De  
479 Bakker PI, Daly MJ, Sham PC. PLINK: a tool set for whole-genome association and population-  
480 based linkage analyses. *The American journal of human genetics*. 2007 Sep 1;81(3):559-75.
- 481 28. Church DM, Schneider VA, Graves T, Auger K, Cunningham F, Bouk N, Chen HC,  
482 Agarwala R, McLaren WM, Ritchie GR, Albracht D. Modernizing reference genome assemblies.  
483 *PLoS biology*. 2011 Jul 5;9(7):e1001091.
- 484 29. Kent WJ, Sugnet CW, Furey TS, Roskin KM, Pringle TH, Zahler AM, Haussler D. The  
485 human genome browser at UCSC. *Genome research*. 2002 Jun 1;12(6):996-1006.
- 486 30. Prakash S, Kuang SQ, GenTAC Registry Investigators, Regalado E, Guo D, Milewicz D.  
487 Recurrent rare genomic copy number variants and bicuspid aortic valve are enriched in early  
488 onset thoracic aortic aneurysms and dissections. *PloS one*. 2016 Apr 19;11(4):e0153543.
- 489 31. Durocher, D., Charron, F., Warren, R., Schwartz, R. J., Nemer, M. The cardiac transcription  
490 factors Nkx2-5 and GATA-4 are mutual cofactors. *EMBO J*. 16: 5687-5696, 1997.
- 491 32. Tremblay M, Sanchez-Ferras O, Bouchard M. GATA transcription factors in development  
492 and disease. *Development*. 2018 Oct 15;145(20):dev164384.
- 493 33. McCulley DJ, Black BL. Transcription factor pathways and congenital heart disease. *Current*  
494 *topics in developmental biology*. 2012 Jan 1;100:253-77.

- 495 34. Alonso-Montes C, Martín M, Martínez-Arias L, Coto E, Naves-Díaz M, Morís C, Cannata-  
496 Andía JB, Rodríguez I. Variants in cardiac GATA genes associated with bicuspid aortic valve.  
497 *European journal of clinical investigation*. 2018 Dec;48(12):e13027.
- 498 35. Pehlivan T, Pober BR, Brueckner M, Garrett S, Slauch R, Van Rheeden R, Wilson DB,  
499 Watson MS, Hing AV. GATA4 haploinsufficiency in patients with interstitial deletion of  
500 chromosome region 8p23.1 and congenital heart disease. *American journal of medical genetics*.  
501 1999 Mar 19;83(3):201-6.
- 502 36. Li RG, Xu YJ, Wang J, Liu XY, Yuan F, Huang RT, Xue S, Li L, Liu H, Li YJ, Qu XK.  
503 GATA4 loss-of-function mutation and the congenitally bicuspid aortic valve. *The American*  
504 *journal of cardiology*. 2018 Feb.
- 505 37. Glessner JT, Bick AG, Ito K, Homsy JG, Rodriguez-Murillo L, Fromer M, Mazaika E,  
506 Vardarajan B, Italia M, Leipzig J, DePalma SR. Increased frequency of de novo copy number  
507 variants in congenital heart disease by integrative analysis of single nucleotide polymorphism  
508 array and exome sequence data. *Circulation research*. 2014 Oct 24;115(10):884-96.
- 509 38. Zogopoulos G, Ha KC, Naqib F, Moore S, Kim H, Montpetit A, Robidoux F, Laflamme P,  
510 Cotterchio M, Greenwood C, Scherer SW. Germ-line DNA copy number variation frequencies in  
511 a large North American population. *Human genetics*. 2007 Nov;122:345-53.
- 512 39. Yu S, Zhou XG, Fiedler SD, Brawner SJ, Joyce JM, Liu HY. Cardiac defects are infrequent  
513 findings in individuals with 8p23.1 genomic duplications containing GATA4. *Circulation:*  
514 *Cardiovascular Genetics*. 2011 Dec;4(6):620-5.
- 515 40. Mlynarski EE, Sheridan MB, Xie M, Guo T, Racedo SE, McDonald-McGinn DM, Gai X,  
516 Chow EW, Vorstman J, Swillen A, Devriendt K. Copy-number variation of the glucose  
517 transporter gene SLC2A3 and congenital heart defects in the 22q11.2 deletion syndrome. *The*  
518 *American Journal of Human Genetics*. 2015 May 7;96(5):753-64.
- 519 41. Freeman SB, Taft LF, Dooley KJ, Allran K, Sherman SL, Hassold TJ, Khoury MJ, Saker  
520 DM. Population-based study of congenital heart defects in Down syndrome. *American journal of*  
521 *medical genetics*. 1998 Nov 16;80(3):213-7.
- 522 42. Paladini D, Tartaglione A, Agangi A, Teodoro A, Forleo F, Borghese A, Martinelli P. The  
523 association between congenital heart disease and Down syndrome in prenatal life. *Ultrasound in*  
524 *Obstetrics and Gynecology*. 2000 Feb;15(2):104-8.
- 525 43. Laursen HB. Congenital heart disease in Down's syndrome. *Heart*. 1976 Jan 1;38(1):32-8.
- 526 44. Kosaki R, Kosaki K, Matsushima K, Mitsui N, Matsumoto N, Ohashi H. Refining  
527 chromosomal region critical for Down syndrome-related heart defects with a case of cryptic  
528 21q22.2 duplication. *Congenital anomalies*. 2005 Jun;45(2):62-4.
- 529 45. Grossman TR, Gamliel A, Wessells RJ, Taghli-Lamalle O, Jepsen K, Ocorr K, Korenberg  
530 JR, Peterson KL, Rosenfeld MG, Bodmer R, Bier E. Over-expression of DSCAM and COL6A2  
531 cooperatively generates congenital heart defects. *PLoS genetics*. 2011 Nov 3;7(11):e1002344.



- 532 46. Gu H, Smith FC, Taffet SM, Delmar M. High incidence of cardiac malformations in  
533 connexin40-deficient mice. *Circulation research*. 2003 Aug 8;93(3):201-6.
- 534 47. Theis JL, Niaz T, Sundsbak RS, Fogarty ZC, Bamlet WR, Hagler DJ, et al. CELSR1 Risk  
535 Alleles in Familial Bicuspid Aortic Valve and Hypoplastic Left Heart Syndrome. *Circ: Genomic  
536 and Precision Medicine*. 2022;15. doi:10.1161/CIRCGEN.121.003523.
- 537 48. Pottie L, Adamo CS, Beyens A, Lütke S, Tapaneeyaphan P, De Clercq A, et al. Bi-allelic  
538 premature truncating variants in LTBP1 cause cutis laxa syndrome. *The American Journal of  
539 Human Genetics*. 2021;108: 1095–1114. doi:10.1016/j.ajhg.2021.04.016.
- 540 49. Akasaka T, Ocorr K, Lin L, Vogler G, Bodmer R, Grossfeld P. Overexpression of Kif1A in  
541 the Developing Drosophila Heart Causes Valvar and Contractility Defects: Implications for  
542 Human Congenital Heart Disease. *JCDD*. 2020;7: 22. doi:10.3390/jcdd7020022.
- 543 50. Pannu H, Tran-Fadulu V, Papke CL, Scherer S, Liu Y, Presley C, et al. MYH11 mutations  
544 result in a distinct vascular pathology driven by insulin-like growth factor 1 and angiotensin II.  
545 *Human Molecular Genetics*. 2007;16: 2453–2462. doi:10.1093/hmg/ddm201.
- 546 51. Herman DS, Lam L, Taylor MRG, Wang L, Teekakirikul P, Christodoulou D,  
547 et.al. Truncations of titin causing dilated cardiomyopathy. *New England Journal of Medicine*.  
548 2012;366: 619-628. doi: 10.1056/NEJMoa1110186

## 549 Supplemental Data

550

| Cohort     | Study                                 | Samples | Accession       | Microarray                        |
|------------|---------------------------------------|---------|-----------------|-----------------------------------|
| <b>WLS</b> | Wisconsin Longitudinal Study on Aging | 8969    | Phs001157.v1.pl | Illumina HumanOmniExpress-24 v1.1 |
| <b>HRS</b> | Health and Retirement Study           | 9426    | phs000428.v2.pl | Illumina Human Omni2.5-Quad       |

**S1 Table. Summary of Control Cohorts.** Cohort, name of control cohort. Study, study from which genotypes were obtained. Samples, number of control samples in each dataset. Accession, Database of Genotypes and Phenotypes accession number. Microarray, Illumina microarray used for genotyping.

|                       | <b>EBAV</b> | <b>BAVGWAS</b> | <b>WLS</b> | <b>HRS</b> |
|-----------------------|-------------|----------------|------------|------------|
| <b>PennCNV</b>        | 6781        | 73784          | 58115      | 163938     |
| <b>cnvPartition</b>   | 2289        | 33640          | 31148      | 51794      |
| <b>QuantiSNP</b>      | 1798        | 21326          | 14346      | 85312      |
| <b>Merged</b>         | 902         | 7622           | 21343      | 14657      |
| <b>Deletions</b>      | 610         | 2772           | 8170       | 6770       |
| <b>&gt;5 MB</b>       | 9           | 22             | 9830       | 6114       |
| <b>Rare</b>           | 84          | 579            | 1443       | 1372       |
| <b>Rare Deletions</b> | 59          | 181            | 285        | 394        |

551 **S2 Table. Comprehensive CNV Summary.** EBAV, EBAV Cohort including cases and unaffected family members.  
552 BAVGWAS, BAVGWAS cohort. WLS, WLS cohort. HRS, HRS cohort. PennCNV, number of CNV calls detected  
553 by PennCNV algorithm after quality control. cnvPartition, number of CNV calls detected by cnvPartition algorithm  
554 after quality control. QuantiSNP, number of CNVs detected by QuantiSNP algorithm after quality control. Merged,  
555 number of CNV regions after merging initial calls. Deletions, number of CNV regions that are deletions. >5 MB,  
556 number of CNV regions that are larger than 5 megabases. Rare, number of large (> 250 kilobases and less than 5  
557 megabases) CNV regions that occur in less than 1 in 1000 samples based on case-control cohort pairs (EBAV and  
558 WLS; BAVGWAS and HRS). R. Del., number of large, rare deletions. All values reflect the total CNV calls and  
559 regions prior to validation in GenomeStudio.  
560

| <b>Chr.</b> | <b>Start BP</b> | <b>Stop BP</b> | <b>Type</b> |
|-------------|-----------------|----------------|-------------|
| 1           | 187296703       | 187609850      | DEL         |
| 1           | 146326373       | 147340734      | DUP         |
| 1           | 79238015        | 79619893       | DEL         |
| 1           | 228625778       | 228880626      | DUP         |
| 2           | 114458921       | 115208197      | DUP         |
| 2           | 4638261         | 5564549        | DUP         |
| 3           | 31901848        | 32165994       | DUP         |
| 3           | 19363589        | 19813225       | DEL         |
| 4           | 84658825        | 85270309       | DUP         |
| 5           | 25468811        | 25719474       | DEL         |
| 5           | 78016365        | 78286867       | DUP         |
| 6           | 95836160        | 96095769       | DEL         |
| 8           | 89353386        | 89800669       | DEL         |



|    |           |           |     |
|----|-----------|-----------|-----|
| 8  | 2319555   | 2585105   | DUP |
| 8  | 4201652   | 4493979   | DUP |
| 8  | 10111571  | 10721128  | DUP |
| 8  | 11103895  | 11856864  | DUP |
| 8  | 9368431   | 9745798   | DUP |
| 8  | 11448529  | 11732454  | DUP |
| 8  | 11448529  | 11808756  | DUP |
| 10 | 134505252 | 135203544 | DEL |
| 12 | 84108147  | 84443245  | DUP |
| 13 | 70578273  | 71593281  | DUP |
| 15 | 32908301  | 34761123  | DEL |
| 16 | 83302526  | 84016062  | DUP |
| 17 | 1389      | 582832    | DEL |
| 18 | 57590566  | 57955945  | DUP |
| 21 | 41268738  | 41813285  | DUP |
| 21 | 41268738  | 41823356  | DUP |
| 21 | 41278694  | 41823356  | DUP |
| 21 | 41278694  | 41823356  | DUP |
| 22 | 19580050  | 20227551  | DUP |
| 22 | 46261909  | 46931077  | DEL |
| 22 | 48871294  | 51187440  | DEL |

561 **S3 Table. Large, Rare Copy Number Variants Identified in the EBAV Cohort.** Chr., Chromosome on which  
562 CNV is located. Start BP, start basepair of CNV. Stop BP, stop basepair of CNV. Type, denotes if a CNV is a  
563 duplication (DUP) or deletion (DEL) event. All CNVs were validated in GenomeStudio.

| Gene(s)                                                                                                  | Chr. | Start BP  | Stop BP   | Type |
|----------------------------------------------------------------------------------------------------------|------|-----------|-----------|------|
| <i>HYDIN2, NBPF12, LOC728989, NBPF13P, PRKAB2, PDIA3P, FM05, CHD1L, LINC00624, BCL9, ACP6, and GJA5</i>  | 1    | 146326373 | 147340734 | DUP  |
| <i>HYDIN2, NBPF12, LOC728989, NBPF13P, PRKAB2, PDIA3P, FM05, CHD1L, LINC00624, BCL9, ACP6, and GJA5*</i> | 1    | 146326373 | 147229299 | DUP  |
| <i>MIR4782, SLC35F5, ACTR3, LOC100499194, and LOC440900*</i>                                             | 2    | 114426115 | 115208197 | DUP  |
| <i>MIR4782, SLC35F5, ACTR3, LOC100499194, and LOC440900*</i>                                             | 2    | 114614021 | 114732241 | DUP  |
| <i>MIR4782, SLC35F5, ACTR3, LOC100499194, and LOC440900*</i>                                             | 2    | 114458921 | 115208197 | DUP  |
| <i>MIR4782, SLC35F5, ACTR3, LOC100499194, and LOC440900</i>                                              | 2    | 114458921 | 115208197 | DUP  |
| <i>TTN, AX746670, TTN-AS1, and MIR548N</i>                                                               | 2    | 179364778 | 179486671 | DUP  |

|                                                                                                                                                                                  |    |           |           |     |
|----------------------------------------------------------------------------------------------------------------------------------------------------------------------------------|----|-----------|-----------|-----|
| <i>TTN, AX746670, TTN-AS1, and MIR548N*</i>                                                                                                                                      | 2  | 179395466 | 179517632 | DUP |
| <i>GATA4, C8orf49, NEIL2, FDFT1, and CTSB</i>                                                                                                                                    | 8  | 11506208  | 11786255  | DUP |
| <i>GATA4, C8orf49, NEIL2, FDFT1, and CTSB</i>                                                                                                                                    | 8  | 11103895  | 11856864  | DUP |
| <i>GATA4, C8orf49, NEIL2, FDFT1, and CTSB</i>                                                                                                                                    | 8  | 11448529  | 11808756  | DUP |
| <i>GATA4, C8orf49, NEIL2, FDFT1, and CTSB</i>                                                                                                                                    | 8  | 11448529  | 11732454  | DUP |
| <i>PARD3</i>                                                                                                                                                                     | 10 | 35107733  | 35284461  | DUP |
| <i>PARD3</i>                                                                                                                                                                     | 10 | 35107733  | 35271898  | DUP |
| <i>KLHL1 and ATXN8OS</i>                                                                                                                                                         | 13 | 70578273  | 71593281  | DUP |
| <i>KLHL1 and ATXN8OS*</i>                                                                                                                                                        | 13 | 70589082  | 71548725  | DUP |
| <i>KLHL1 and ATXN8OS*</i>                                                                                                                                                        | 13 | 70730307  | 70773605  | DEL |
| <i>NECAB2</i>                                                                                                                                                                    | 16 | 83302526  | 84016062  | DUP |
| <i>NECAB2*</i>                                                                                                                                                                   | 16 | 83303915  | 83999565  | DUP |
| <i>PCP4, DSCAM, MIR4760, and DSCAM-AS1</i>                                                                                                                                       | 21 | 41278694  | 41823356  | DUP |
| <i>PCP4, DSCAM, MIR4760, and DSCAM-AS1</i>                                                                                                                                       | 21 | 41268738  | 41813285  | DUP |
| <i>PCP4, DSCAM, MIR4760, and DSCAM-AS1</i>                                                                                                                                       | 21 | 41278694  | 41823356  | DUP |
| <i>PCP4, DSCAM, MIR4760, and DSCAM-AS1</i>                                                                                                                                       | 21 | 41278694  | 41813285  | DUP |
| <i>PCP4, DSCAM, MIR4760, and DSCAM-AS1</i>                                                                                                                                       | 21 | 41268738  | 41823356  | DUP |
| <i>TBX1, GNB1L, C22orf29, TXNRD2, COMT, MIR4761, ARVCF, TANGO2, MIR185, DGCR8, MIR3618, MIR1306, TRMT2A, RANBP1, ZDHHC8, LOC388849, LOC284865, and LINC00896</i>                 | 22 | 19580050  | 20227551  | DUP |
| <i>TBX1, GNB1L, C22orf29, TXNRD2, COMT, MIR4761, ARVCF, TANGO2, MIR185, DGCR8, MIR3618, MIR1306, TRMT2A, RANBP1, ZDHHC8, LOC388849, LOC284865, LINC00896, RTN4R, and MIR1286</i> | 22 | 18877787  | 21461607  | DUP |

564  
565  
566  
567

**S4 Table. Rare CNVs Enriched in EBAV Cohort.** Gene(s), genes intersected by CNV. Chr, chromosome on which each CNV is on. Start BP, start basepair of each CNV. Stop BP, stop basepair of each CNV. Type, denotes if a CNV was a duplication (DUP) or deletion (DEL) event.

568 \* Indicates the call was from an unaffected family member.  
569

| Gene(s)                                                                                    | Chr | Start BP  | Stop BP   | Type |
|--------------------------------------------------------------------------------------------|-----|-----------|-----------|------|
| <i>LOC100507334</i>                                                                        | 2   | 110852875 | 111406073 | DUP  |
| <i>LOC100507334</i>                                                                        | 2   | 110982530 | 112007875 | DUP  |
| <i>MIR128-2</i>                                                                            | 3   | 35775249  | 35938795  | DUP  |
| <i>MIR128-2</i>                                                                            | 3   | 35775249  | 35938795  | DUP  |
| <i>MIR128-2</i>                                                                            | 3   | 35785608  | 35936616  | DUP  |
| <i>TMPRSS11E, UGT2B17, UGT2B15, UGT2B10</i>                                                | 4   | 69599357  | 69712995  | DUP  |
| <i>AHRR, C5orf55, EXOC3, FLJ00157, AK023178, PP7080, BC013821, LOC100996325, and CEP72</i> | 5   | 323965    | 889536    | DUP  |
| <i>AHRR, C5orf55, EXOC3, FLJ00157, AK023178, PP7080, and BC013821</i>                      | 5   | 287907    | 602256    | DUP  |
| <i>AHRR, C5orf55, EXOC3, FLJ00157, AK023178, PP7080, and BC013821</i>                      | 5   | 310925    | 548342    | DUP  |
| <i>AHRR, C5orf55, EXOC3, FLJ00157, AK023178, PP7080, BC013821, LOC100996325, and CEP72</i> | 5   | 426109    | 673408    | DUP  |
| <i>AHRR, C5orf55, EXOC3, FLJ00157, AK023178, PP7080, BC013821, LOC100996325, and CEP72</i> | 5   | 589727    | 701920    | DUP  |
| <i>AHRR, C5orf55, EXOC3, FLJ00157, AK023178, PP7080, BC013821, LOC100996325, and CEP72</i> | 5   | 589727    | 701920    | DUP  |
| <i>NIPBL</i>                                                                               | 5   | 36764235  | 37046626  | DUP  |
| <i>NIPBL</i>                                                                               | 5   | 36805679  | 37046626  | DUP  |
| <i>NIPBL</i>                                                                               | 5   | 36898424  | 37046626  | DUP  |
| <i>NIPBL</i>                                                                               | 5   | 36911625  | 37052624  | DUP  |
| <i>SGK223, CLDN23, and MFHAS1</i>                                                          | 8   | 8064756   | 11143272  | DUP  |
| <i>SGK223, CLDN23, and MFHAS1</i>                                                          | 8   | 8064756   | 11882065  | DUP  |
| <i>SGK223, CLDN23, and MFHAS1</i>                                                          | 8   | 8064756   | 8655355   | DUP  |
| <i>SGK223, CLDN23, and MFHAS1</i>                                                          | 8   | 8114228   | 8627839   | DUP  |
| <i>SGK223, CLDN23, and MFHAS1</i>                                                          | 8   | 8202294   | 8674049   | DUP  |
| <i>SGK223, CLDN23, and MFHAS1</i>                                                          | 8   | 8221088   | 8650456   | DUP  |
| <i>CUL5</i>                                                                                | 11  | 107755731 | 107965390 | DUP  |
| <i>NANOG and NANOGNB</i>                                                                   | 12  | 7893437   | 8101326   | DUP  |

|                                                                                                           |    |          |          |     |
|-----------------------------------------------------------------------------------------------------------|----|----------|----------|-----|
| <i>NANOG</i> and <i>NANOGNB</i>                                                                           | 12 | 7918339  | 8109412  | DUP |
| <i>NANOG</i> and <i>NANOGNB</i>                                                                           | 12 | 7942473  | 8109412  | DUP |
| <i>NANOG</i> and <i>NANOGNB</i>                                                                           | 12 | 7942945  | 8123777  | DUP |
| <i>NANOG</i> and <i>NANOGNB</i>                                                                           | 12 | 7942945  | 8105015  | DUP |
| <i>NANOG</i> and <i>NANOGNB</i>                                                                           | 12 | 7945559  | 8101326  | DUP |
| <i>NANOG</i> and <i>NANOGNB</i>                                                                           | 12 | 7945559  | 8105015  | DUP |
| <i>NANOG</i> and <i>NANOGNB</i>                                                                           | 12 | 7945559  | 8105015  | DUP |
| <i>NANOG</i> and <i>NANOGNB</i>                                                                           | 12 | 7945559  | 8109412  | DUP |
| <i>NANOG</i> and <i>NANOGNB</i>                                                                           | 12 | 7945559  | 8130958  | DUP |
| <i>UBE2MP1</i> , <i>LOC283914</i> ,<br><i>LOC146481</i> , and <i>LOC100130700</i>                         | 16 | 34355747 | 34740580 | DUP |
| <i>LOC283914</i> and <i>LOC146481</i>                                                                     | 16 | 34428972 | 34723621 | DUP |
| <i>LOC283914</i>                                                                                          | 16 | 34433468 | 34663346 | DUP |
| <i>FAM101B</i> , <i>VPS53</i> , and <i>FAM57A</i>                                                         | 17 | 1389     | 641023   | DUP |
| <i>FAM101B</i> , <i>VPS53</i> , <i>FAM57A</i> ,<br><i>GEMIN4</i> , <i>DQ581337</i> , and<br><i>DBIL5P</i> | 17 | 225778   | 906268   | DEL |
| <i>FAM101B</i> , <i>VPS53</i> , <i>FAM57A</i> ,<br>and <i>GEMIN4</i>                                      | 17 | 225778   | 649766   | DUP |
| <i>FAM101B</i> , <i>VPS53</i> , <i>FAM57A</i> ,<br>and <i>GEMIN4</i>                                      | 17 | 238906   | 650372   | DUP |
| <i>FAM101B</i> , <i>VPS53</i> , <i>FAM57A</i> ,<br><i>GEMIN4</i> , <i>DQ581337</i> , and<br><i>DBIL5P</i> | 17 | 284614   | 831667   | DUP |
| <i>RYR1</i> , <i>MAP4K1</i> , and <i>EIF3K</i>                                                            | 19 | 38683266 | 39116961 | DUP |
| <i>RYR1</i> , <i>MAP4K1</i> , and <i>EIF3K</i>                                                            | 19 | 38976659 | 39116961 | DUP |
| <i>RYR1</i> , <i>MAP4K1</i> , and <i>EIF3K</i>                                                            | 19 | 38993142 | 39116961 | DUP |
| <i>RYR1</i> , <i>MAP4K1</i> , and <i>EIF3K</i>                                                            | 19 | 38993142 | 39116961 | DUP |
| <i>CYP2A7</i> , <i>CYP2G1P</i> , <i>CYP2B7P1</i> ,<br>and <i>CYP2B6</i>                                   | 19 | 41349732 | 41508557 | DUP |
| <i>CYP2A7</i> , <i>CYP2G1P</i> , <i>CYP2B7P1</i> ,<br>and <i>CYP2B6</i>                                   | 19 | 41350509 | 41600054 | DUP |
| <i>CYP2A7</i> , <i>CYP2G1P</i> , <i>CYP2B7P1</i> ,<br>and <i>CYP2B6</i>                                   | 19 | 41354458 | 41588347 | DUP |
| <i>CYP2A7</i> , <i>CYP2G1P</i> , <i>CYP2B7P1</i> ,<br>and <i>CYP2B6</i>                                   | 19 | 41386035 | 41522338 | DUP |
| <i>CYP2A7</i> , <i>CYP2G1P</i> , <i>CYP2B7P1</i> ,<br>and <i>CYP2B6</i>                                   | 19 | 41386814 | 41531705 | DUP |
| <i>CYP2A7</i> , <i>CYP2G1P</i> , <i>CYP2B7P1</i> ,<br>and <i>CYP2B6</i>                                   | 19 | 41386814 | 41519306 | DUP |

570 **S5 Table. Rare CNVs Enriched in BAVGWAS Cohort.** Gene(s), genes intersected by CNV. Chr, chromosome on  
571 which each CNV is on. Start BP, start basepair of each CNV. Stop BP, stop basepair of each CNV. Type, denotes if  
572 a CNV was a duplication (DUP) or deletion (DEL) event.  
573  
574

| <b>Principal Gene/Regions</b> | <b>Chr.</b> | <b>Start BP</b> | <b>Stop BP</b> | <b>Type</b> |
|-------------------------------|-------------|-----------------|----------------|-------------|
| <i>KIF1A</i>                  | 2           | 241640262       | 241678528      | DUP         |
| <i>KIF1A</i>                  | 2           | 241640262       | 241678528      | DUP         |
| <i>KIF1A</i>                  | 2           | 241652252       | 241678528      | DUP         |
| <i>KIF1A*</i>                 | 2           | 241626057       | 241702124      | DUP         |
| <i>KIF1A*</i>                 | 2           | 241607616       | 241702124      | DUP         |
| <i>KIF1A*</i>                 | 2           | 241644718       | 241709924      | DUP         |
| <i>LTBP1</i>                  | 2           | 32639775        | 33331219       | DUP         |
| <i>LTBP1</i>                  | 2           | 32775984        | 33331219       | DUP         |
| <i>LTBP1*</i>                 | 2           | 32633925        | 33331219       | DUP         |
| <i>LTBP1*</i>                 | 2           | 32633925        | 33331219       | DUP         |
| <i>LTBP1*</i>                 | 2           | 32639775        | 33331219       | DUP         |
| <i>RAF1</i>                   | 3           | 12599717        | 12803792       | DUP         |
| <i>FLT4*</i>                  | 5           | 180019198       | 180056863      | DEL         |
| <i>MICA</i>                   | 6           | 31360255        | 31453029       | DEL         |
| <i>MICA</i>                   | 6           | 31360255        | 31485928       | DEL         |
| <i>MICA</i>                   | 6           | 31360255        | 31487876       | DEL         |
| <i>MICA</i>                   | 6           | 31360255        | 31457633       | DUP         |
| <i>MICA</i>                   | 6           | 31361397        | 31453029       | DUP         |
| <i>MICA*</i>                  | 6           | 31360255        | 31453029       | DEL         |
| <i>MICA*</i>                  | 6           | 31360255        | 31453029       | DEL         |
| <i>MICA*</i>                  | 6           | 31360255        | 31453029       | DEL         |
| <i>MICA*</i>                  | 6           | 31360255        | 31485928       | DEL         |
| <i>MICA*</i>                  | 6           | 31360255        | 31485928       | DEL         |
| <i>MICA*</i>                  | 6           | 31360255        | 31485928       | DEL         |
| <i>MICA*</i>                  | 6           | 31383960        | 31485928       | DEL         |
| <i>MICA*</i>                  | 6           | 31355260        | 31453029       | DEL         |
| <i>GATA4**</i>                | 8           | 11506208        | 11786255       | DUP         |
| <i>GATA4**</i>                | 8           | 11506208        | 11999394       | DUP         |
| <i>MUC5B</i>                  | 11          | 1078312         | 1300406        | DUP         |
| <i>NANOG*</i>                 | 12          | 7945559         | 8123777        | DUP         |
| <i>MYH11</i>                  | 16          | 14975292        | 16295863       | DUP         |
| <i>MYH11</i>                  | 16          | 15484868        | 18309593       | DUP         |
| <i>MAPK3</i>                  | 16          | 27977483        | 30174024       | DUP         |
| <i>NCOR1</i>                  | 17          | 15976558        | 16012829       | DUP         |
| <i>DSCAM**</i>                | 21          | 41278161        | 41856480       | DUP         |
| <i>DSCAM*</i>                 | 21          | 41278694        | 41813285       | DUP         |
| <i>22q11*</i>                 | 22          | 19698129        | 19883189       | DEL         |
| <i>22q11*</i>                 | 22          | 19682627        | 19755127       | DEL         |
| <i>22q11</i>                  | 22          | 19701341        | 19776365       | DEL         |
| <i>22q11</i>                  | 22          | 19701341        | 19808938       | DEL         |

22q11 22 20742450 21461607 DEL

575 **S5 Table. EBAV CNVs intersecting with Genes of Interest.** Gene/Region, Principal gene or region of interest  
 576 intersected by CNV. Chr, chromosome on which each CNV is on. Start BP, start basepair of each CNV. Stop BP,  
 577 stop basepair of each CNV. Type, denotes if a CNV was a duplication (DUP) or deletion (DEL) event.

578 \* Indicates the call was from an unaffected family member.

579 \*\* Indicates the call was from an affected family member from a multiplex family.

580

| Principal Gene/Regions | Chr. | Start BP  | Stop BP   | Type |
|------------------------|------|-----------|-----------|------|
| <i>GJA5</i>            | 1    | 145723645 | 148343177 | DUP  |
| <i>GJA5</i>            | 1    | 145723739 | 148343177 | DUP  |
| <i>GJA5</i>            | 1    | 145801230 | 147824365 | DUP  |
| <i>GJA5</i>            | 1    | 147166377 | 147308112 | DUP  |
| <i>TMEM87B/FBLN7</i>   | 2    | 110982530 | 113103748 | DUP  |
| <i>TMEM87B/FBLN8</i>   | 2    | 111399346 | 113103748 | DEL  |
| <i>TMEM87B/FBLN9</i>   | 2    | 111404636 | 113215796 | DUP  |
| <i>KIF1A</i>           | 2    | 241623458 | 241697884 | DUP  |
| <i>KIF1A</i>           | 2    | 241623458 | 241697884 | DUP  |
| <i>KIF1A</i>           | 2    | 241623458 | 241698298 | DUP  |
| <i>KIF1A</i>           | 2    | 241623458 | 241724479 | DUP  |
| <i>KIF1A</i>           | 2    | 241626057 | 241689833 | DUP  |
| <i>KIF1A</i>           | 2    | 241626057 | 241689833 | DUP  |
| <i>KIF1A</i>           | 2    | 241626057 | 241689833 | DUP  |
| <i>KIF1A</i>           | 2    | 241626057 | 241689833 | DUP  |
| <i>KIF1A</i>           | 2    | 241626057 | 241689833 | DUP  |
| <i>KIF1A</i>           | 2    | 241626057 | 241702124 | DUP  |
| <i>KIF1A</i>           | 2    | 241626057 | 241702124 | DUP  |
| <i>KIF1A</i>           | 2    | 241640262 | 241689833 | DUP  |
| <i>KIF1A</i>           | 2    | 241640262 | 241697773 | DUP  |
| <i>LTBP1</i>           | 2    | 32619581  | 33299434  | DUP  |
| <i>LTBP1</i>           | 2    | 32619581  | 33331219  | DUP  |
| <i>LTBP1</i>           | 2    | 32633925  | 33302342  | DUP  |
| <i>LTBP1</i>           | 2    | 32633925  | 33302342  | DUP  |
| <i>LTBP1</i>           | 2    | 32633925  | 33331219  | DUP  |
| <i>LTBP1</i>           | 2    | 32633925  | 33331219  | DUP  |
| <i>LTBP1</i>           | 2    | 32633925  | 33331219  | DUP  |
| <i>LTBP1</i>           | 2    | 32633925  | 33369552  | DUP  |
| <i>LTBP1</i>           | 2    | 32689829  | 33331219  | DUP  |
| <i>RAF1</i>            | 3    | 12645681  | 12739194  | DUP  |
| <i>TGFBR2</i>          | 3    | 29993977  | 31273870  | DEL  |
| <i>SOX7/GATA4</i>      | 8    | 8064756   | 11882065  | DUP  |
| <i>SOX7/GATA4</i>      | 8    | 8064756   | 11882065  | DUP  |
| <i>SOX7/GATA4</i>      | 8    | 8064756   | 11882065  | DUP  |

|                   |    |           |           |     |
|-------------------|----|-----------|-----------|-----|
| <b>SOX7/GATA4</b> | 8  | 8064756   | 12009597  | DUP |
| <b>SOX7/GATA4</b> | 8  | 10109379  | 11987960  | DUP |
| <b>SOX7</b>       | 8  | 10587741  | 10683929  | DEL |
| <b>GATA4</b>      | 8  | 10914233  | 11853596  | DUP |
| <b>GATA4</b>      | 8  | 11349186  | 11821835  | DUP |
| <b>GATA4</b>      | 8  | 11385469  | 11882065  | DUP |
| <b>TGFBR1</b>     | 9  | 101861767 | 102092282 | DUP |
| <b>MYH11</b>      | 16 | 14761719  | 16281154  | DUP |
| <b>MYH11</b>      | 16 | 14761719  | 16315360  | DUP |
| <b>MYH11</b>      | 16 | 14975292  | 16299148  | DEL |
| <b>MYH11</b>      | 16 | 14975292  | 16308351  | DUP |
| <b>MYH11</b>      | 16 | 14975292  | 16308351  | DUP |
| <b>MYH11</b>      | 16 | 14975292  | 16308351  | DUP |
| <b>MYH11</b>      | 16 | 14975292  | 16308351  | DUP |
| <b>MYH11</b>      | 16 | 14975292  | 16308351  | DUP |
| <b>MYH11</b>      | 16 | 14975292  | 16308351  | DUP |
| <b>MYH11</b>      | 16 | 14975292  | 16308351  | DUP |
| <b>MYH11</b>      | 16 | 14975292  | 16315360  | DUP |
| <b>MYH11</b>      | 16 | 15092120  | 16291933  | DUP |
| <b>MYH11</b>      | 16 | 15125441  | 16292128  | DUP |
| <b>MYH11</b>      | 16 | 15240816  | 18584353  | DUP |
| <b>MAPK3</b>      | 16 | 29647342  | 30199713  | DUP |
| <b>MAPK4</b>      | 16 | 29647342  | 30199713  | DUP |
| <b>MAPK5</b>      | 16 | 29647342  | 30199713  | DUP |
| <b>DSCAM</b>      | 21 | 41254102  | 41516071  | DUP |
| <b>DSCAM</b>      | 21 | 41254456  | 41536215  | DUP |
| <b>22q11</b>      | 22 | 16874656  | 20241436  | DEL |
| <b>22q11</b>      | 22 | 17818807  | 19002159  | DUP |
| <b>22q11</b>      | 22 | 18644702  | 21726191  | DUP |
| <b>22q11</b>      | 22 | 18877787  | 21461607  | DUP |
| <b>22q11</b>      | 22 | 18877787  | 21461607  | DUP |
| <b>22q11</b>      | 22 | 18877787  | 21028007  | DEL |
| <b>22q11</b>      | 22 | 18877787  | 21804903  | DEL |
| <b>22q11</b>      | 22 | 19062020  | 20264937  | DUP |
| <b>22q11</b>      | 22 | 19667336  | 20329526  | DEL |
| <b>22q11</b>      | 22 | 19682627  | 20233865  | DEL |
| <b>22q11</b>      | 22 | 19682627  | 20262166  | DEL |
| <b>22q11</b>      | 22 | 19693418  | 20264937  | DEL |
| <b>22q11</b>      | 22 | 19701341  | 20300738  | DEL |
| <b>22q11</b>      | 22 | 19724224  | 20300738  | DEL |
| <b>22q11</b>      | 22 | 19951816  | 24298181  | DUP |
| <b>22q11</b>      | 22 | 20719325  | 21726191  | DEL |



|                      |    |          |          |     |
|----------------------|----|----------|----------|-----|
| <b>22q11</b>         | 22 | 21246902 | 22702508 | DEL |
| <b>22q11</b>         | 22 | 21424414 | 22015771 | DUP |
| <b><i>CESLR1</i></b> | 22 | 45236935 | 48193505 | DEL |
| <b><i>CESLR1</i></b> | 22 | 46751367 | 47159028 | DUP |
| <b><i>CESLR1</i></b> | 22 | 46924254 | 46931077 | DEL |

581 **S7 Table. BAVGWAS CNVs intersecting with Genes of Interest.** Gene/Region, Principal gene or region of  
 582 interest intersected by CNV. Chr, chromosome on which each CNV is on. Start BP, start basepair of each CNV.  
 583 Stop BP, stop basepair of each CNV. Type, denotes if a CNV was a duplication (DUP) or deletion (DEL) event.  
 584  
 585

| Chr. | Start BP  | Stop BP   | Type | Description    |
|------|-----------|-----------|------|----------------|
| 2    | 138066736 | 143331537 | DUP  | Mosaic LOH     |
| 2    | 183476298 | 189945752 | DUP  | Mosaic LOH     |
| 3    | 143040791 | 168814375 | DUP  | Mosaic LOH     |
| 3    | 66206     | 7768285   | DEL  | Constitutional |
| 6    | 148301116 | 156618923 | DEL  | Constitutional |
| 7    | 101355402 | 106892492 | DEL  | Mosaic         |
| 8    | 6970806   | 12525566  | DUP  | Constitutional |
| 8    | 170692    | 11987960  | DUP  | Constitutional |
| 14   | 101350298 | 107283150 | DUP  | Mosaic LOH     |
| 14   | 71135027  | 107283150 | DUP  | Mosaic LOH     |
| 15   | 80465431  | 88497147  | DUP  | Mosaic LOH     |
| 15   | 93593528  | 102150818 | DUP  | Mosaic LOH     |
| 15   | 22761722  | 28540261  | DEL  | Constitutional |
| 17   | 15175570  | 22234751  | DUP  | Mosaic         |
| 18   | 67445173  | 78010620  | DEL  | Constitutional |
| 20   | 31265482  | 50716159  | DEL  | Mosaic         |
| 20   | 61098     | 25829977  | DEL  | Mosaic         |
| 20   | 31240778  | 48292606  | DEL  | Mosaic         |
| 20   | 50320079  | 62960292  | DUP  | Constitutional |
| 21   | 14359894  | 48099610  | DUP  | Trisomy 21     |
| 21   | 14359894  | 48099610  | DUP  | Trisomy 21     |

586 **S8 Table. Large Genomic Events in BAVGWAS** Chr., Chromosome CNV on which CNV is located. Start BP,  
 587 start base pair of CNV. Stop BP, stop base pair of CNV. Type, denotes if a CNV is a duplication (DUP) or deletion  
 588 (DEL) event. Description, denotes if the CNV was a mosaic loss of heterozygosity (Mosaic LOH), loss of  
 589 heterozygosity (LOH), mosaic (Mosaic), constitutional (constitutional), or trisomy 21 (Trisomy 21) event.  
 590  
 591

| PROBAND       | GENE          | SEGREGATES? | WITH CNV                             | NO CNV                  | SEX    |
|---------------|---------------|-------------|--------------------------------------|-------------------------|--------|
| <b>BAV064</b> | <i>GATA4</i>  | Yes         | Father*,<br>Paternal<br>Grandfather* | Paternal<br>Grandmother | Female |
| <b>BAV475</b> | <i>DSCAM</i>  | Yes         | Sister*                              | Father                  | Female |
| <b>BAV787</b> | <i>CELSR1</i> | Yes         | None                                 | Daughter                | Female |



|               |              |     |             |                 |        |
|---------------|--------------|-----|-------------|-----------------|--------|
| <b>BAV330</b> | <i>KIF1A</i> | Yes | None        | Father          | Female |
| <b>BAV478</b> | <i>KIF1A</i> | Yes | None        | Father          | Male   |
| <b>BAV829</b> | <i>LTBP1</i> | No  | Son, Father | Mother, Brother | Female |

592 **S9 Table. Pedigree Information for CNVs that Segregated with Disease.** Proband, identification number of  
593 proband with CNV intersecting with gene of interest. Gene, gene of interest intersected by CNV. Segregates?,  
594 indicates if the CNV segregated with disease. Family With CNV, family members of proband that were found to  
595 have a CNV intersecting with the respective gene. Family Without CNV, family members of proband who were not  
596 found to have a CNV intersecting with the respective gene. Family members are listed if their genotype was  
597 available for the study. Sex, sex of the proband.  
598 \*Indicates family members who also have BAV.
